48. Volders PG, Stengl M, van Opstal JM, Gerlach U, Spätjens RL, Beekman JD, Sipido KR, Vos MA: Probing the contribution of IKs to canine ventricular repolarization: Key role for beta-adrenergic receptor stimulation. *Circulation* 2003; 107:2753–60
49. Cardinal R, Savard P, Armour JA, Nadeau R, Carson DL, LeBlanc AR: Mapping of ventricular tachycardia induced by thoracic neural stimulation in dogs. *Can J Physiol Pharmacol* 1986; 4:411–18
50. Coronel R, Wilms-Schopman FJ, Opthof T, Janse MJ: Dispersion of repolarization and arrhythmogenesis. *Heart Rhythm* 2009; 6:537–43
51. Janse MJ, Schwartz PJ, Wilms-Schopman F, Peters RJ, Durrer D: Effects of unilateral stellate ganglion stimulation and ablation on electrophysiologic changes induced by acute myocardial ischemia in dogs. *Circulation* 1985; 72:585–95
52. Goldhaber JI, Xie LH, Duong T, Motter C, Khuu K, Weiss JN: Action potential duration restitution and alternans in rabbit ventricular myocytes: The key role of intracellular calcium cycling. *Circ Res* 2005; 4:459–66
53. Ben-David J, Zipes DP: Differential response to right and left ansae subclaviae stimulation of early afterdepolarizations and ventricular tachycardia induced by cesium in dogs. *Circulation* 1988; 78:1241–50
54. Opthof T, Coronel R, Vermeulen JT, Verberne HJ, van Capelle FJ, Janse MJ: Dispersion of refractoriness in normal and ischemic canine ventricle: Effects of sympathetic stimulation. *Cardiovasc Res* 1993; 27:1954–60

## ANESTHESIOLOGY REFLECTIONS FROM THE WOOD LIBRARY-MUSEUM

### Kadavy's "Kan Klamp": Alliteration and Economy from an "Ether-can Attachment Dropper"

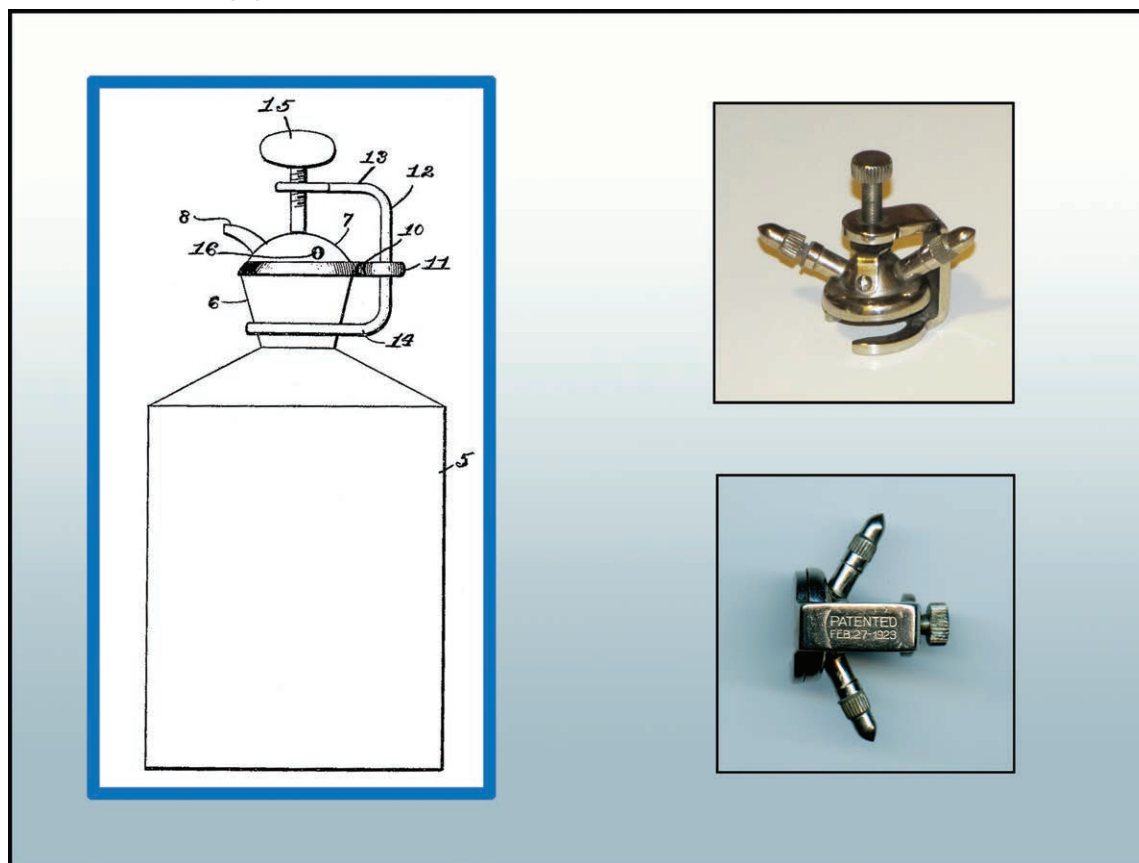

From Ravenna, Nebraska, on March 21, 1922, Godfrey Joseph Kadavy, M.D. (1889 to 1972), filed his "Ether-can attachment dropper" drawing (*left*) with the U.S. Patent Office. According to Kadavy's filing, he designed this invention as: (1) "a novel form of closure to be secured to the discharge opening of a can for dispensing the contents [ether] of the can by drops" and (2) a "means for securing the auxiliary closure to the can top to insure a fluid-tight connection between the mouth of the can and closure." On February 27, 1923, this self-described "Bohemian-American Cornhusker" was granted U.S. Patent 1446751. His patent design (*left*) was mass-produced as the "Kan Klamp" (*upper right*). On the back of the C-arm of each "Klamp" is stamped the date on which the patent was granted: "PATENTED / FEB. 27 — 1923" (*lower right*). This was merely the first of at least five U.S. patents that inventor-physician Kadavy would be granted between 1923 and 1958. (Copyright © the American Society of Anesthesiologists' Wood Library-Museum of Anesthesiology.)

George S. Bause, M.D., M.P.H., Honorary Curator and Laureate of the History of Anesthesia, Wood Library-Museum of Anesthesiology, Schaumburg, Illinois, and Clinical Associate Professor, Case Western Reserve University, Cleveland, Ohio. UJYC@aol.com.
